# Supplementary material for: Effect of Flaxseed Oil Cake Extract on the Microbial Quality, Texture and Shelf Life of Gluten-Free Bread
Source: MDPI journal article supplement (doi:10.3390/foods12030595), 2023-01-31
Supplement: s1 [file s1]

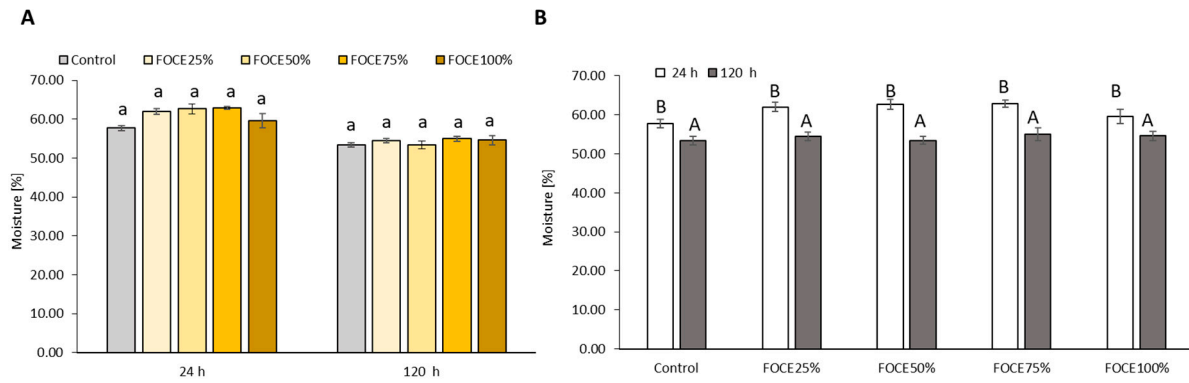

**Supplementary Materials Figure S1.** Changes in the moisture of experimental GFBs related to FOCE level (A) and storage time (B). <sup>a</sup> similar lowercase letters indicate no significant differences between GFBs with different FOCE levels at the same storage time ( $p < 0.05$ ); <sup>A-B</sup> different capital letters indicate significant differences between storage times for the same bread ( $p < 0.05$ ).

**Suppl. Material. Table S1.** Instrumental texture profile of experimental GFBs with FOCE during storage.

|          | Hardness [N]                | Springiness               | Cohesiveness               | Gumminess                   | Chewiness                   | Resilience                |
|----------|-----------------------------|---------------------------|----------------------------|-----------------------------|-----------------------------|---------------------------|
| 24 h     |                             |                           |                            |                             |                             |                           |
| Control  | 16.54 <sup>aA</sup> ± 0.37  | 0.90 <sup>aA</sup> ± 0.03 | 0.35 <sup>aB</sup> ± 0.03  | 5.18 <sup>aA</sup> ± 0.78   | 4.84 <sup>aA</sup> ± 0.70   | 0.15 <sup>aA</sup> ± 0.03 |
| FOCE25%  | 16.72 <sup>aA</sup> ± 1.77  | 0.92 <sup>aA</sup> ± 0.02 | 0.41 <sup>abB</sup> ± 0.02 | 6.85 <sup>abA</sup> ± 0.73  | 6.28 <sup>abA</sup> ± 0.75  | 0.17 <sup>aA</sup> ± 0.01 |
| FOCE50%  | 16.96 <sup>aA</sup> ± 1.04  | 0.90 <sup>aA</sup> ± 0.04 | 0.41 <sup>abB</sup> ± 0.05 | 7.79 <sup>abA</sup> ± 0.71  | 6.99 <sup>abcA</sup> ± 1.14 | 0.19 <sup>aA</sup> ± 0.02 |
| FOCE75%  | 18.65 <sup>abA</sup> ± 2.22 | 0.92 <sup>aA</sup> ± 0.02 | 0.45 <sup>bb</sup> ± 0.03  | 7.82 <sup>abA</sup> ± 0.52  | 7.13 <sup>bcA</sup> ± 0.41  | 0.20 <sup>aA</sup> ± 0.03 |
| FOCE100% | 21.43 <sup>bA</sup> ± 3.06  | 0.91 <sup>aA</sup> ± 0.03 | 0.45 <sup>bb</sup> ± 0.02  | 9.08 <sup>bA</sup> ± 1.18   | 8.60 <sup>cA</sup> ± 1.27   | 0.20 <sup>aA</sup> ± 0.02 |
| 72 h     |                             |                           |                            |                             |                             |                           |
| Control  | 16.69 <sup>aA</sup> ± 3.64  | 0.89 <sup>aA</sup> ± 0.02 | 0.29 <sup>aA</sup> ± 0.02  | 6.04 <sup>aA</sup> ± 0.50   | 5.35 <sup>aA</sup> ± 0.54   | 0.12 <sup>aA</sup> ± 0.01 |
| FOCE25%  | 21.22 <sup>aAB</sup> ± 0.12 | 0.91 <sup>aA</sup> ± 0.03 | 0.35 <sup>bAB</sup> ± 0.04 | 8.01 <sup>abAB</sup> ± 1.38 | 6.86 <sup>abAB</sup> ± 0.56 | 0.14 <sup>aA</sup> ± 0.03 |
| FOCE50%  | 21.27 <sup>aB</sup> ± 1.77  | 0.89 <sup>aA</sup> ± 0.03 | 0.36 <sup>bAB</sup> ± 0.04 | 8.02 <sup>abA</sup> ± 1.19  | 7.06 <sup>abA</sup> ± 1.06  | 0.15 <sup>aA</sup> ± 0.03 |
| FOCE75%  | 21.55 <sup>aAB</sup> ± 2.11 | 0.88 <sup>aA</sup> ± 0.04 | 0.36 <sup>bA</sup> ± 0.02  | 8.02 <sup>abA</sup> ± 0.83  | 7.04 <sup>abA</sup> ± 0.63  | 0.15 <sup>aA</sup> ± 0.01 |
| FOCE100% | 23.67 <sup>bAB</sup> ± 1.03 | 0.89 <sup>aA</sup> ± 0.04 | 0.39 <sup>bAB</sup> ± 0.02 | 9.11 <sup>bA</sup> ± 0.59   | 8.44 <sup>bA</sup> ± 0.17   | 0.15 <sup>aA</sup> ± 0.01 |
| 120 h    |                             |                           |                            |                             |                             |                           |
| Control  | 22.31 <sup>aB</sup> ± 2.15  | 0.91 <sup>aA</sup> ± 0.05 | 0.29 <sup>aA</sup> ± 0.03  | 6.41 <sup>aA</sup> ± 0.52   | 5.84 <sup>aA</sup> ± 0.17   | 0.12 <sup>aA</sup> ± 0.01 |
| FOCE25%  | 26.88 <sup>bC</sup> ± 0.48  | 0.92 <sup>aA</sup> ± 0.06 | 0.33 <sup>abA</sup> ± 0.02 | 10.15 <sup>bb</sup> ± 1.16  | 7.85 <sup>bB</sup> ± 0.42   | 0.13 <sup>aA</sup> ± 0.02 |
| FOCE50%  | 27.43 <sup>bC</sup> ± 2.48  | 0.85 <sup>aA</sup> ± 0.06 | 0.33 <sup>abA</sup> ± 0.05 | 10.08 <sup>bA</sup> ± 1.74  | 8.25 <sup>bA</sup> ± 0.13   | 0.15 <sup>aA</sup> ± 0.01 |
| FOCE75%  | 27.50 <sup>bB</sup> ± 2.87  | 0.88 <sup>aA</sup> ± 0.03 | 0.36 <sup>bA</sup> ± 0.02  | 10.04 <sup>bB</sup> ± 0.86  | 8.80 <sup>bcB</sup> ± 0.80  | 0.15 <sup>aA</sup> ± 0.02 |
| FOCE100% | 30.14 <sup>bC</sup> ± 1.53  | 0.90 <sup>aA</sup> ± 0.02 | 0.36 <sup>bA</sup> ± 0.01  | 10.91 <sup>bb</sup> ± 0.75  | 9.53 <sup>cA</sup> ± 0.39   | 0.15 <sup>aA</sup> ± 0.01 |

<sup>a-c</sup> different lowercase letters indicate significant differences between GFBs with different FOCE levels at the same storage time ( $p < 0.05$ ); <sup>A-C</sup> different capital letters indicate significant differences between storage times for the same bread ( $p < 0.05$ ).
